# Supplementary material
Source: PubMed Central journal article supplement (PMC5899630)
Supplement: NIHMS939868-supplement-3.pdf [file NIHMS939868-supplement-3.pdf]

**Table S1. Frequency of CSCs after transplantation of the indicated cells into NOD/SCID mice**

| Cell Lines          | # of Injected Cells |                 |                 |                 | CSC Frequency* |
|---------------------|---------------------|-----------------|-----------------|-----------------|----------------|
|                     | 5×10 <sup>2</sup>   | 10 <sup>3</sup> | 10 <sup>4</sup> | 10 <sup>5</sup> |                |
| Parental            | 1/8                 | 8/8             | 8/8             | 8/8             | 1/719          |
| IL6 <sup>-/-</sup>  | 0/8                 | 2/8             | 5/8             | 8/8             | 1/7,142        |
| IL1A <sup>-/-</sup> | 0/8                 | 1/8             | 2/8             | 5/8             | 1/16,667       |
| HER2 KD             | 0/8                 | 1/8             | 3/8             | 8/8             | 1/14,285       |

Note: \*, CSC frequency was calculated from limit-dilution analysis based on Poisson distribution.

**Table S3. Positive correlation between IL-1α and HER2 or IL6 expression in breast cancer tissues.**

| Gene Expression    | IL-1α          |                | Chi-square (p value) <sup>a</sup> |
|--------------------|----------------|----------------|-----------------------------------|
|                    | Negative n (%) | Positive n (%) |                                   |
| <b>HER2 status</b> |                |                |                                   |
| Negative           | 50 (54.3)      | 42 (45.6)      | 0.001                             |
| Positive           | 11 (25.0)      | 33 (75.0)      |                                   |
| <b>IL-6 status</b> |                |                |                                   |
| Negative           | 51 (67.1)      | 25 (32.9)      | < 0.0001                          |
| Positive           | 10 (16.7)      | 50 (79.3)      |                                   |

Note: <sup>a</sup>P values were calculated using Fisher's exact test.

**Table S4. Association of IL-1α and IL6 expression status with CD44/CD24 phenotypes.**

| Gene expression status | All tumors (n=136) | CD44/CD24 Phenotypes |                    |                   |                    | Chi-square (p value) <sup>a</sup> |
|------------------------|--------------------|----------------------|--------------------|-------------------|--------------------|-----------------------------------|
|                        |                    | CD44+/CD24- (n=69)   | CD44+/CD24+ (n=21) | CD44-/CD24+ (n=2) | CD44-/CD24- (n=42) |                                   |
| <b>IL-1α Status</b>    |                    |                      |                    |                   |                    |                                   |
| Negative               | 61 (44.8)          | 20 (32.7)            | 8 (13.1)           | 1 (1.6)           | 30 (49.2)          | 0.0002                            |
| Positive               | 75 (55.2)          | 49 (65.3)            | 13 (17.3)          | 1 (1.3)           | 12 (16.0)          |                                   |
| <b>IL-6 Status</b>     |                    |                      |                    |                   |                    |                                   |
| 20 Negative            | 76 (57.4)          | 29 (41.0)            | 6 (7.7)            | 1(1.3)            | 38 (50.0)          | < 0.0001                          |
| Positive               | 60 (42.6)          | 40 (63.8)            | 15 (27.6)          | 1 (1.7)           | 4 (6.9)            |                                   |

Note: <sup>a</sup>P values were calculated using Fisher's exact test.
